## **COVID -19: could green tea catechins reduce the risks?**

Maksim Storozhuk

Bogomoletz Institute of Physiology, National Academy of Sciences of Ukraine, Kyiv, Ukraine

corresponding author

Dr. M. Storozhuk

Bogomoletz Institute of Physiology, National Academy of Science of Ukraine

4 Bogomoletz Street

Kiev 01024

Ukraine

Tel.: +380 44 2562052

Fax: +380 44 2536458

e-mail: maksim@biph.kiev.ua

## **Abstract**

*Objectives:* Several lines of emerging pharmacological and epidemiological evidence imply that overall risks related to COVID-19 may be reduced by green tea catechins. Therefore, it may be expected that: (i) higher green tea consumption is associated with lower COVID-19 morbidity and/or mortality; (ii) countries with higher per/capita green tea consumption would be less affected by COVID-19. The aim of this study was to assess the second possibility.

*Study design:* This was a cross-sectional study.

*Methods:* Among countries with at least 3 million population (n=134), countries with relatively high (above 150 g) per/capita green tea consumption have been tentatively identified (n=21); (ii) normalized to population values of COVID-19 cases (morbidity) and deaths (mortality) for groups of countries with high and low per/capita green tea consumption were compared.

*Results:* Striking differences in COVID-19 morbidity (and mortality) between groups of countries with higher and lower green tea consumption. The differences were still observed after the adjustment for the onset of the disease. Besides, preliminary analysis using multiple linear regression approach suggests that the associations are present at the level of individual countries.

*Conclusion:* Evidence supporting the idea that green tea constituents could reduce overall risks related to COVID-19 has been obtained. The results are promising and are in line with emerging evidence from other studies including pharmacological ones. Nevertheless, because of limitations of this study the idea still should be considered as a hypothesis requiring further assessment.

**Key words:** green tea, green tea catechins, epigallocatechin-3-gallate, SARS-CoV-2

## **Introduction.**

There is emerging evidence suggesting that green tea constituents, in particular catechins such as (-)-epigallocatechin (EGC), and (-)-epigallocatechin-3-gallate (EGCG) may be protective in regard of COVID-19. As briefly outlined below this could be due to (i) direct anti-viral activity and (ii) the influence on factors associated with COVID-19 severity and mortality.

Green tea catechins, are known to have anti-viral activity against several viruses<sup>1-4</sup> including viruses causing respiratory diseases.<sup>5</sup> Recent target-based virtual ligand screening study suggests that at least one catechin (EGCG), is likely to target papain-like proteinase (PLpro), an indispensable enzyme in the process of coronavirus replication and infection of the host.<sup>6</sup> Inhibition of SARS-CoV-2 3CL-Protease by EGCG has been recently demonstrated *in vitro*.<sup>7</sup>

Additionally, several factors associated with COVID-19 mortality are likely to be affected by green tea constituents. Indeed, there is evidence that green tea catechins: lower cholesterol levels;<sup>8,9</sup> have anti-diabetic<sup>10</sup> and anti-obesity effects;<sup>11</sup> are beneficial in cardiovascular disease<sup>12</sup>.

Besides, EGCG is protective in diseases with uncontrolled immune activation, thus, may ameliorate severity of COVID-19<sup>13</sup> since the latter is related to overreaction of the immune system.<sup>14</sup>

Altogether these results suggest that green tea catechins could reduce overall risks related to COVID-19. If so, it may be expected that countries with higher level of green tea consumption are less affected by COVID-19.

To address this hypothesis a *preliminary* ecological analysis was performed in this study. For this purpose: (i) among countries with at least 3 million population (n=134), countries with relatively high (above 150 g) per/capita green tea consumption have been identified (n=21); (ii) normalized to population values of

COVID-19 cases (morbidity) and deaths (mortality) for groups of countries with high and low per/capita green tea consumption were compared.

## **Methods**

*Ethics Statement.* Ethical approval was not deemed necessary as this was an analysis of publicly available data.

### *Identification of countries with relatively high per/capita green tea consumption*

It has been previously reported that higher per/capita green tea consumption is typical for some countries in Asia, North Africa and Middle East.<sup>15</sup> Values for several countries in Asia (China, Vietnam, Japan and Indonesia) have been reported.<sup>16</sup> There is also information regarding Taiwan, arbitrary considered as a green tea consuming in the framework of this work because of predominant consumption of the Paochong tea (oxidized by only (8-12%) and Oolong tea (semioxidised).<sup>17</sup> (The value of green tea consumption in Taiwan, indicated in the Table 1 (750 g) was arbitrary estimated as equal to one half of that reported<sup>18</sup> for *total* tea consumption in this country.) The relevant and reliable information regarding green tea consumption in the other countries is scarce,<sup>19</sup> it is not as trivial as it may seem to find it. Therefore, to estimate the values of per/capita green tea consumption in the other countries the following approach was used. It was assumed that the difference between annual green tea import and export in a particular country (except countries with considerable green tea production) is roughly equivalent to annual green tea consumption. Thus, the difference between import and export divided by population should give a reasonable estimate of per/capita consumption. Indeed, such an approach is used for estimation for countries that do not produce tea.<sup>19</sup>

The information about green tea import and export for particular countries was obtained from Commodity Trade Statistics Database | United Nations Statistics

Division database.<sup>20</sup> Since for some countries recent records are unavailable, to minimize time bias, it was arbitrary chosen to use values for year 2016 as a standard (still for a few countries older records in the database were used in this work).

Using reported values for China, Vietnam, Japan and Indonesia,<sup>16</sup> an estimate for Taiwan and the approach mentioned above it has been found that per/capita green tea consumption is above 150 grams in twenty one countries. However, it is essential to note that the list (Table 1) is probably incomplete (see considerations below), because the approach used for the estimate has several limitations. Namely, it cannot be excluded that some countries with considerable green tea per/capita consumption have not been identified among those producing green tea (for instance, Myanmar, South Korea, Papua New Guinea). Additionally, some countries may have not been identified because of absence of the relevant records in the UN database (for instance, Tajikistan). Finally, the estimates may be biased by import/export operations not reflected in the UN database. This is especially likely for ‘smaller’ import/export operations and thus for less populated countries. For this reason detailed screening of the database was limited to countries with at least 3 million population.

#### *Data regarding COVID-19 morbidity and mortality*

All data were obtained from open resources. Information on total number of cases and total number of deaths was obtained from ‘Worldometers info. Coronavirus’.<sup>21</sup> For some comparisons information about COVID-19 morbidity (defined as number of cases per million population) and mortality (defined as number of deaths per million population) for a specific date was directly obtained from.<sup>21</sup> For others, considering that the onset of the disease was not simultaneous in different countries an adjustment for this factor was made as described below. Date when the total number of confirmed cases in a particular country became 50 (or more) was determined based on information provided in<sup>21</sup> and considered as a reference time point (referred further as

the onset date). Then information about the total number of cases/deaths at a date five months after the onset date was obtained from <sup>21</sup> and normalized to population. These adjusted values were (also) used for comparisons. Five-month period after the onset date has been chosen as a compromise between longer period for analysis and a number of countries available for analysis (performed in September-October 2020). Since in some countries the onset occurred in May, June and even July (2020) some countries were excluded from a comparison of the *adjusted* values.

### *Statistical analysis*

Since the variables of COVID-19 morbidity and COVID-19 mortality do not have a normal distribution, <sup>22</sup> non-parametric statistic was primarily employed for the analysis (as suggested in <sup>22, 23</sup>). Namely, Wilcoxon (Mann-Whitney U Test) for Unpaired Data and Spearman Rank Correlation were used for the analysis. On the hand, for multiple linear regression analysis, an approach similar to that previously reported <sup>22</sup> was used. In this analysis, morbidity and mortality per million of population were transformed to the common logarithm (log<sub>10</sub>) to adjust for normality of the distribution as suggested previously. <sup>22</sup> ‘KyPlot’ software was employed for statistical assessments.

### **Results**

A tentative list of countries with relatively high (above 150 g) per/capita green tea consumption was created using the approach described in Methods by screening relevant information for countries and territories listed in <sup>21</sup> and population with at least three million (134 countries and territories). Among those 21 were identified as countries with ‘high’ (above 150 g) per/capita green tea consumption (**Table 1**).

**Table 1** A tentative list of countries with ‘high’ (above 150 g per/capita) green tea consumption.

| Country                      | Per capita green tea consumption (g) | COVID-19 morbidity (per million population) | COVID-19 mortality (per million population) |
|------------------------------|--------------------------------------|---------------------------------------------|---------------------------------------------|
| 1                            | Mauritania                           | 3400                                        | 1583                                        |
| 2                            | Morocco                              | 1780                                        | 2846                                        |
| 3                            | Taiwan                               | 750                                         | 21                                          |
| 4                            | Afghanistan                          | 720                                         | 1001                                        |
| 5                            | Mongolia                             | 657                                         | 95                                          |
| 6                            | Japan                                | 650                                         | 629                                         |
| 7                            | Mali                                 | 537                                         | 149                                         |
| 8                            | Uzbekistan                           | 520                                         | 1580                                        |
| 9                            | Libya                                | 450                                         | 4272                                        |
| 10                           | Vietnam                              | 380                                         | 0.4                                         |
| 11                           | Senegal                              | 344                                         | 876                                         |
| 12                           | Algeria                              | 332                                         | 1141                                        |
| 13                           | China                                | 320                                         | 59                                          |
| 14                           | Hong Kong                            | 293                                         | 672                                         |
| 15                           | Tunisia                              | 248                                         | 950                                         |
| 16                           | Guinea                               | 229                                         | 786                                         |
| 17                           | Niger                                | 213                                         | 49                                          |
| 18                           | Burkina Faso                         | 167                                         | 91                                          |
| 19                           | Indonesia                            | 200                                         | 922                                         |
| 20                           | UAE                                  | 196                                         | 8717                                        |
| 21                           | Denmark                              | 183                                         | 4105                                        |
| World <sup>1</sup> (average) |                                      | 6315                                        | 101                                         |

Per capita green tea consumption is a coarse estimate (see Methods for details). In relation to further analysis, information regarding COVID-19 morbidity and mortality is also provided. This information was retrieved from ‘Worldometer’ as provided on September 23. World – refers to top 212 countries and territories (ranked by population) affected by COVID-19 according to information from ‘Worldometer’ as provided on September 23.

Among the other 113 countries: in 15 the overall annual balance between import and export of green tea was negative; for 12 countries no records were found in the UN database. Since information about *production* of green tea in countries with negative import/balance was not available, the group of these 113 countries was considered as a group with (i) low and (ii) undetermined consumption. Finally, a group of countries with the *estimated* consumption below 150 g was considered as a ‘low-consuming’ (n=86). Information about total number of COVID-19 cases (per one million population) and total number of COVID-19- death (per one million population) was obtained from ‘Worldometer’<sup>21</sup> as provided on September 23 for the countries from the above mentioned three groups and summarized in **Table 2**.

**Table 2**

COVID-19 morbidity (per one million population) and mortality (per one million population) in relation to per/capita green tea consumption.

|                       | Group 1<br>(countries with<br>'high' green tea<br>consumption)<br>N=21 | Group 2<br>(countries with 'low' or<br>undetermined green tea<br>consumption)<br>N=113 | Group 3<br>(countries with<br>'low' green tea<br>consumption)<br>N=86 | World |
|-----------------------|------------------------------------------------------------------------|----------------------------------------------------------------------------------------|-----------------------------------------------------------------------|-------|
| COVID-19<br>morbidity | 876<br>(95-1580)                                                       | 2409 **<br>(453-6968)                                                                  | 3784 ***<br>(639-7258)                                                | 2307  |
| COVID-19<br>mortality | 14<br>(3-37)                                                           | 49 **<br>(8-189)                                                                       | 68 ***<br>(11-236)                                                    | 35    |

Values are: median and interquartile range (IQR). \*\* (P<0.01) and \*\*\* (P<0.001) denote significance level of difference as compared to Group 1 (Wilcoxon (Mann-Whitney U Test) for Unpaired Data). Raw data for individual countries are from 'Worldometer' as provided on September 23. World – refers to top 212 countries and territories (ranked by population) affected by COVID-19 according to information from 'Worldometer' as provided on September 23.

Both, COVID-19 morbidity and mortality were strikingly (several times) lower in the Group 1 as compared to Group 2 (and Group3). Besides, the differences between were highly significant, especially between Group 1 and Group 3 (**Table 2**).

These results support the hypothesis that green tea constituents could reduce overall risks related to COVID-19. On the other hand, this preliminary analysis has several limitations. In particular, the onset of the disease was not simultaneous in different countries. To adjust for this the approach described in Method section was used.

A summary for the adjusted values is shown in **Table 3**. Notice a reduction 'N' in the groups as compared to Table 2. This is due to late onset of the disease in some of the countries (Values for these countries (one country in Group 1; eight countries in Group 2 and Group 3) were not available at a time of analysis.) Nevertheless, there



were still profound and statistically significant differences in COVID-19 morbidity and mortality between Group 1 and Group 2/Group 3 (Table 3).

**Table 3**

Adjusted for the onset COVID-19 morbidity (per one million population) and mortality (per one million population) in relation to per/capita green tea consumption.

|                       | Group 1<br>(countries with 'high' green<br>tea consumption)<br><br>N=20 | Group 2<br>(countries with 'low' or<br>undetermined green tea<br>consumption)<br><br>N=105 | Group 3<br>(countries with 'low'<br>green tea consumption)<br><br>N=78 |
|-----------------------|-------------------------------------------------------------------------|--------------------------------------------------------------------------------------------|------------------------------------------------------------------------|
| COVID-19<br>morbidity | 571<br>(88-1023)                                                        | 1724 **<br>(350-5195)                                                                      | 2611 ***<br>(566-5673)                                                 |
| COVID-19<br>mortality | 8<br>(3-23)                                                             | 37 **<br>(8-155)                                                                           | 62 ***<br>(13-192)                                                     |

Values are: median, IQR. \*\* (P<0.01) and \*\*\* (P<0.001) denote significance level of difference as compared to Group 1 (Wilcoxon (Mann-Whitney U Test) for Unpaired Data). Values represent epidemic situation five month after the onset of the disease (see Methods for more details).

To check for possible association between per capita green tea consumption and COVID-19 morbidity/mortality at the level of individual countries corresponding correlation coefficients were calculated. Namely, Spearman Rank Correlation was used to calculate correlation coefficients between: (i) the *adjusted* for the onset value of morbidity (or mortality) and (ii) per capita green tea consumption in a particular country. Thus, the total number of countries considered in this analysis was 98.

It has been found that there is a weak (Rho=-0.177) correlation between green tea consumption and the morbidity. Similarly, a weak (Rho=-0.194) correlation between the green tea consumption and the mortality has been observed. In both cases the correlations were not statistically significant (P=0.08 and P=0.055 respectively).

On the other hand, stronger and significant correlations were observed when multiple linear regression analysis accounting for several confounders was used. In this analysis: (i) morbidity and mortality per million population were transformed to the common logarithm ( $\log_{10}$ ) to adjust for normality of the distribution (as suggested earlier <sup>22</sup>); (ii) in addition to green tea consumption, factors, reported previously as important confounders were included. In regard of the latter, percentage of urban population, <sup>22,24</sup> percentage of population aged above 65 <sup>24</sup> and population density <sup>24</sup> were incorporated.

It has been found that there are: weak but statistically significant correlations between morbidity (and mortality) and green tea consumption; stronger correlations between morbidity (and mortality) and percentage of urban population. Plots for COVID-19 morbidity and mortality in relation to these two factors are shown in **Fig. 1**.

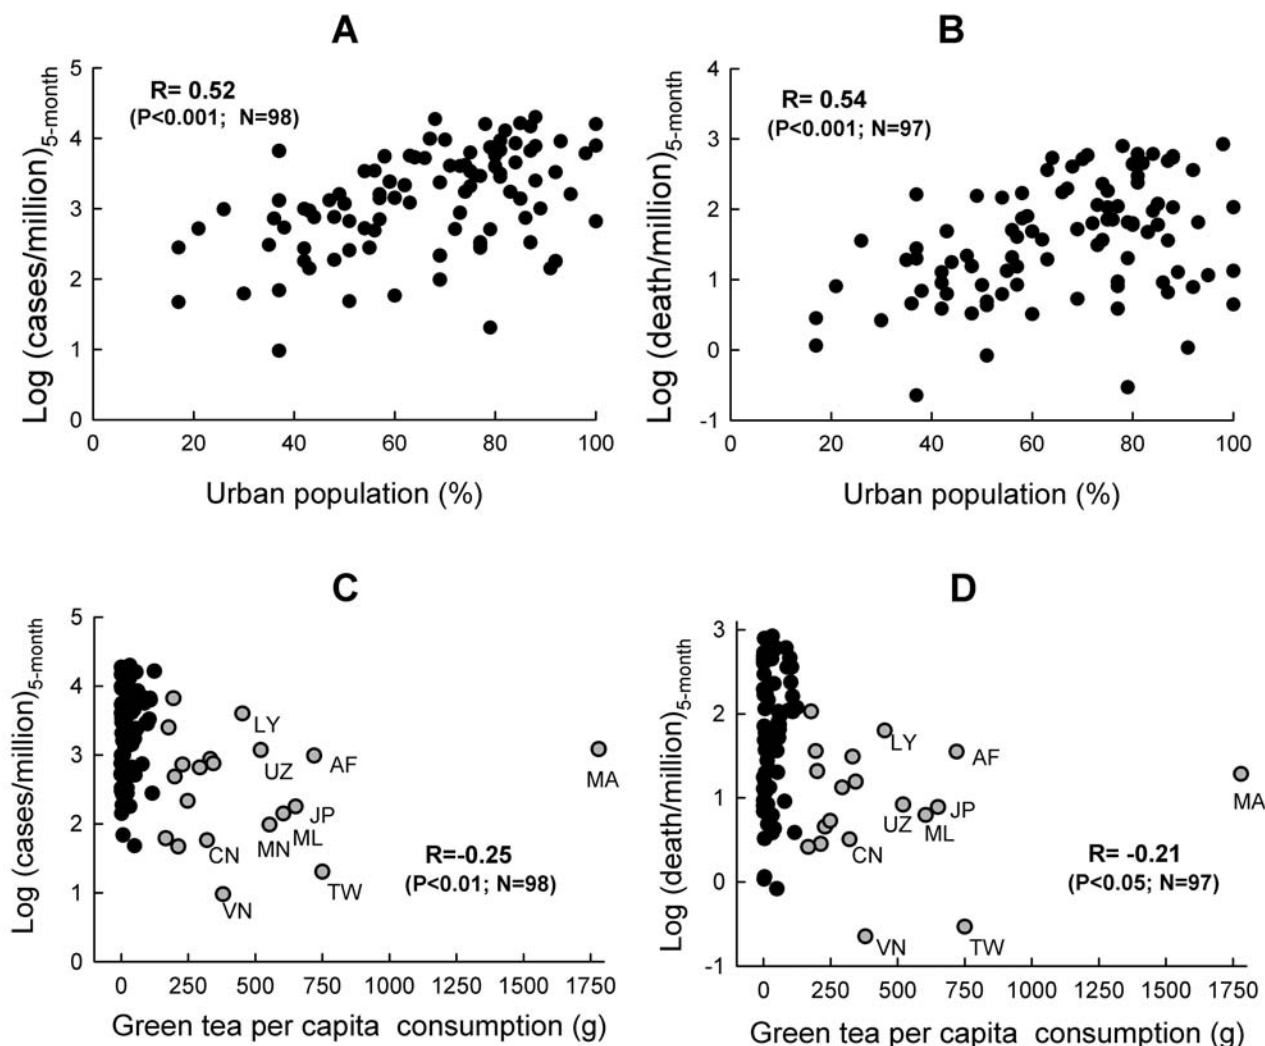

**Figure 1.** Percentage of urban population and per capita green tea consumption are associated with COVID-19 morbidity and mortality.

COVID-19 morbidity (**A**, **C**) and mortality (**B**, **D**) in relation to % of urban population (upper panel) and green tea consumption (lower panel). Morbidity and mortality values are adjusted for the onset of the disease (5-month after the onset). Countries with values available as of October 15, 2020 were included. Values of regression coefficient  $R$  and significance levels denoted were calculated using the *multiple* linear regression model,  $N$  – number of countries included in the analysis. On plots **C** and **D** empty circles represent values for the countries with ‘high’ green tea consumption; for some of those standard two letter country codes are provided (AF- Afghanistan; CN –China; JP –Japan; LY- Libya; MA- Morocco; ML –Mali; MN-Mongolia, NE –Niger; TW-Taiwan; UZ - Uzbekistan). Since number of deaths (per million) in Mongolia was 0 (as of October 15, 2020) and could not be transformed to the logarithm, this country was excluded from the analysis in regard of the *mortality*.

Thus, it appears that COVID-19 morbidity and mortality are indeed associated with green tea consumption at the level of individual countries. Nevertheless, considering that only a few potential confounding factors were included in the multiple linear regression analysis, these results should be considered as preliminary. Additional data (and/or data analysis) are required to clarify this issue unambiguously.

## ***Discussion***

*The main finding* of this study is that higher green tea consumption is associated with lower COVID-19 morbidity/mortality at the level of ecological study. Indeed, there are striking differences in COVID-19 morbidity/mortality between groups of countries with ‘high’ and ‘low’ green tea consumption. The differences were still observed after the adjustment for the onset of the disease. Besides, preliminary analysis using multiple linear regression approach suggests that the associations are present at the level of individual countries. At this level, this is presumably the first evidence supporting the idea that green tea constituents may reduce the risks related to COVID-19. These results are in agreement with several lines of emerging evidence implying that green tea catechins may be effective in prevention/treatment of COVID-19 or amelioration of its severity<sup>6-10,13</sup> (as outlined in the Introduction). Nevertheless, in the context of this study, it would be fair to mention that green catechins are not *the only* constituents of green tea. Other constituents may be also of importance for potential beneficial effects.

*Limitations of the study and potential future directions.* For most of the countries green tea consumption was estimated based on the annual balance between its import and export. Although this approach is used for coarse estimates,<sup>19</sup> apparently, it has

several limitations as outlined in Methods. Thus, the list of countries with ‘high’ green tea consumption should be considered as a tentative. It cannot be excluded that some countries with considerable green tea per/capita consumption have not been identified among those producing green tea (for instance, Myanmar, South Korea, Papua New Guinea). It would be of interest to obtain relevant information in regard of these countries, include it in the analysis and check how this would affect associations considered in this work.

Other limitations include multiple factors that may differentially affect COVID-19 morbidity and mortality in distinct countries. For instance, the administrative strategies to prevent transmission; population density, percentage of rural population, percentage of older population; condition-specific mortality risks TB infection and BCG vaccination.<sup>22, 23, 25</sup> Potential role of only some of these factors was assessed in this study. Finally, it is important to notice that results of any ecological study, taken alone, could only provide the information about a correlation rather than a causal relation. Thus, experimental studies are required to either reject or confirm the potential causal relation. Importantly, green tea catechins are considered as safe by FDA and already have been investigated in experimental studies in relation to some infections. Moreover, results of at least one *randomized placebo-controlled* study<sup>26</sup> strongly suggest that green tea catechins can protect against acute upper respiratory tract infections (thus, quite likely, infections induced by members of coronavirus family). Therefore, it may be expected that green tea catechins can also protect against the infection induced by SARS-CoV-2. If this is the case, it would have very important implications. Possible efficacy of green tea catechins in treatment of COVID-19 and amelioration of its severity should be also assessed in observational and experimental epidemiological studies as potentially very important.

*Conclusion.*

Evidence supporting the idea that green tea constituents could reduce overall risks related to COVID-19 has been obtained. The results are promising and are in line with emerging evidence from other studies including pharmacological ones. Nevertheless, because of limitations of this study the idea still should be considered as a hypothesis requiring further assessment.

## ***Author statements***

### *Ethics Statement*

Ethical approval was not deemed necessary as this was an analysis of publicly available data.

### *Funding*

This research did not receive any specific grant from funding agencies in the public, commercial, or not-for-profit sectors.

### *Competing interests*

None declared.

### *Acknowledgments*

I would like express my gratitude to personnel of the open resources for creating excellent opportunities for research.

## References

1. Xu J, Xu Z, Zheng W. A Review of the Antiviral Role of Green Tea Catechins. *Molecules* 2017;**22** (8).<https://doi.org/10.3390/molecules22081337>
2. Mhatre S, Srivastava T, Naik S, Patravale V. Antiviral activity of green tea and black tea polyphenols in prophylaxis and treatment of COVID-19: A review. *Phytomedicine* 2020;153286. <https://doi.org/10.1016/j.phymed.2020.153286>
3. Ghrairi T, Jarraud S, Alves A, Fleury Y, El SA, Chouchani C. New Insights into and Updates on Antimicrobial Agents from Natural Products. *Biomed Res Int* 2019;**2019**:7079864.<https://doi.org/10.1155/2019/7079864>
4. Reygaert WC. Green Tea Catechins: Their Use in Treating and Preventing Infectious Diseases. *Biomed Res Int* 2018;**2018**:9105261.<https://doi.org/10.1155/2018/9105261>
5. Furushima D, Ide K, Yamada H. Effect of Tea Catechins on Influenza Infection and the Common Cold with a Focus on Epidemiological/Clinical Studies. *Molecules* 2018;**23** (7). <https://doi.org/10.3390/molecules23071795>
6. Wu C, Liu Y, Yang Y, Zhang P, Zhong W, Wang Y et al. Analysis of therapeutic targets for SARS-CoV-2 and discovery of potential drugs by computational methods. *Acta Pharm Sin B* 2020. <https://doi.org/10.1016/j.apsb.2020.02.008>
7. Jang M, Park YI, Cha YE, Park R, Namkoong S, Lee JI et al. Tea Polyphenols EGCG and Theaflavin Inhibit the Activity of SARS-CoV-2 3CL-Protease In Vitro. *Evid Based Complement Alternat Med* 2020;**2020**:5630838.<https://doi.org/10.1155/2020/5630838>
8. Momose Y, Maeda-Yamamoto M, Nabetani H. Systematic review of green tea epigallocatechin gallate in reducing low-density lipoprotein cholesterol levels of humans. *Int J Food Sci Nutr* 2016;**67** (6):606-13.<https://doi.org/10.1080/09637486.2016.1196655>
9. Xu R, Yang K, Li S, Dai M, Chen G. Effect of green tea consumption on blood lipids: a systematic review and meta-analysis of randomized controlled trials. *Nutr J* 2020;**19** (1):48. <https://doi.org/10.1186/s12937-020-00557-5>

10. Khan N, Mukhtar H. Tea and health: studies in humans. *Curr Pharm Des* 2013;**19**(34):6141-7. <https://doi.org/10.2174/1381612811319340008>
11. Lin Y, Shi D, Su B, Wei J, GÄfman MA, Sedanur MM et al. The effect of green tea supplementation on obesity: A systematic review and dose-response meta-analysis of randomized controlled trials. *Phytother Res* 2020. <https://doi.org/10.1002/ptr.6697>
12. Abe SK, Inoue M. Green tea and cancer and cardiometabolic diseases: a review of the current epidemiological evidence. *Eur J Clin Nutr* 2020. <https://doi.org/10.1038/s41430-020-00710-7>
13. Menegazzi M, Campagnari R, Bertoldi M, Crupi R, Di PR, Cuzzocrea S. Protective Effect of Epigallocatechin-3-Gallate (EGCG) in Diseases with Uncontrolled Immune Activation: Could Such a Scenario Be Helpful to Counteract COVID-19? *Int J Mol Sci* 2020;**21**(14). <https://doi.org/10.3390/ijms21145171>
14. Tang Y, Liu J, Zhang D, Xu Z, Ji J, Wen C. Cytokine Storm in COVID-19: The Current Evidence and Treatment Strategies. *Front Immunol* 2020;**11**:1708. <https://doi.org/10.3389/fimmu.2020.01708>
15. Coffee, tea, mate, methylxanthines and methylglyoxal. IARC Working Group on the Evaluation of Carcinogenic Risks to Humans. Lyon, 27 February to 6 March 1990. *IARC Monogr Eval Carcinog Risks Hum* 1991;**51**:1-513.
16. Yukio Kosugi. Green tea consumption. *World Green Tea Association Available at: <http://www.o-cha.net/english/teacha/distribution/greentea3.html>* 2020.
17. Tea Research and Extension Station. Taiwan Tea Industry. <https://www.tres.gov.tw/en/ws.php?id=1000> 2020.<https://doi.org/>
18. INTERGOVERNMENTAL GROUP ON TEA TWENTY-THIRD SESSION. Emerging Trends in Tea Consumption: Informing a Generic Promotion Process. Available at: <http://www.fao.org/economic/est/est-commodities/tea/tea-meetings/tea23/en/> 2018.
19. INTERGOVERNMENTAL GROUP ON TEA. CURRENT MARKET SITUATION AND MEDIUM TERM OUTLOOK. Available at: <http://www.fao.org/economic/est/est-commodities/tea/tea-meetings/tea23/en/> 2018.
20. Commodity Trade Statistics Database|. United Nations Statistics Division.
21. Worldometers info. Coronavirus update. Available at: <https://www.worldometers.info/coronavirus/>, 2020.



22. Urashima M, Otani K, Hasegawa Y, Akutsu T. BCG Vaccination and Mortality of COVID-19 across 173 Countries: An Ecological Study. *Int J Environ Res Public Health* 2020;**17**(15). <https://doi.org/10.3390/ijerph17155589>
23. Madan M, Pahuja S, Mohan A, Pandey RM, Madan K, Hadda V et al. TB infection and BCG vaccination: are we protected from COVID-19? *Public Health* 2020;**185**:91-2. <https://doi.org/10.1016/j.puhe.2020.05.042>
24. Escobar LE, Molina-Cruz A, Barillas-Mury C. BCG vaccine protection from severe coronavirus disease 2019 (COVID-19). *Proc Natl Acad Sci U S A* 2020;**117**(30):17720-6. <https://doi.org/10.1073/pnas.2008410117>
25. Aguiar M, Stollenwerk N. Condition-specific mortality risk can explain differences in COVID-19 case fatality ratios around the globe. *Public Health* 2020;**188**:18-20. <https://doi.org/10.1016/j.puhe.2020.08.021>
26. Furushima D, Nishimura T, Takuma N, Iketani R, Mizuno T, Matsui Y et al. Prevention of Acute Upper Respiratory Infections by Consumption of Catechins in Healthcare Workers: A Randomized, Placebo-Controlled Trial. *Nutrients* 2019;**12**(1). <https://doi.org/10.3390/nu12010004>
